# Supplementary material
Source: ML conference proceedings conference paper supplement (https://proceedings.mlr.press/v97/goyal19a.html)
Supplement: Supplementary file [file goyal19a-supp.pdf]

---

# Supplementary for Counterfactual Visual Explanations

---

Yash Goyal<sup>1</sup> Ziyang Wu<sup>2</sup> Jan Ernst<sup>2</sup> Dhruv Batra<sup>1</sup> Devi Parikh<sup>1</sup> Stefan Lee<sup>1</sup>

## Abstract

In this supplement we provide additional results on the SHAPES (Andreas et al., 2016) dataset in Section 1.

## 1. Experiments on SHAPES

**Dataset.** To first evaluate our model on a simple setting, we created a dataset of SHAPES images (Andreas et al., 2016) for classification using the code released by the authors. This dataset consists of 3x3 grid images of size 30 pixels x 30 pixels. Only one out of the 9 cells contains a shape which can be either a circle, a square or a triangle, which is also the label of the image. Any of these shapes can take any of the three colors – blue, green and red. There is some small random perturbation in the size of each shape and in the pixel values of each color.

**Classification model.** We trained a simple CNN consisting of 1 convolutional layer followed by 2 fully connected layers with 3 output classes. The network achieves 100% test accuracy, which is unsurprising due to the simplicity of the task.

**Experimental settings.** For this task, the size of spatial features is 3 x 3 x 100. We randomly choose a distractor class  $c'$  different from the predicted class  $c$ , and a distractor image  $I'$  from the set of images for which the model predicts  $c'$ .

**Results.** Since these images are generated automatically, the cell location containing the shape is known for each image. Hence, the correct discriminative attention maps are known for each pair of  $(I, I')$  and the results of our approach can be quantitatively evaluated automatically. We found that approach is able to find the accurate attention maps 100% of the times. An example is shown in Fig. 1.

## References

Andreas, J., Rohrbach, M., Darrell, T., and Klein, D. Neural module networks. In *CVPR*, 2016.

---

<sup>1</sup>Georgia Institute of Technology <sup>2</sup>Siemens Corporation. Correspondence to: Yash Goyal <ygoyal@gatech.edu>.

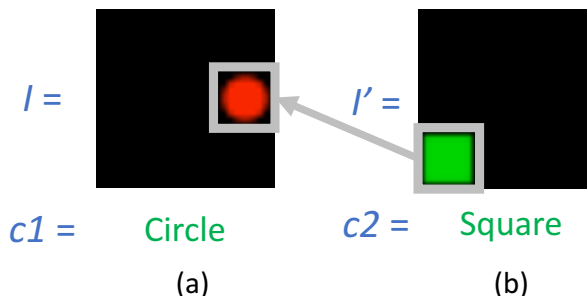

Figure 1. Results on SHAPES images. Each image is made up of 3x3 cells, one of which contains a shape. (a) Our approach highlights the middle right cell in the image  $I$  containing the *circle* shape which led the model to predict the class *Circle* instead of class *Square*. (b) In addition, our approach also highlights the bottom left cell containing the *square* shape in image  $I'$  of the distractor class *Square* such that if the middle right cell in image  $I$  looked like the bottom left cell in image  $I'$ , the models prediction would have been *Square*.
